# Supplementary material for: Phylostratigraphic Analysis Shows the Earliest Origination of the Stress Associated Genes in <em>A. thaliana</em>
Source: Preprints.org preprint supplement (doi:10.20944/preprints201811.0352.v1), 2018-11-15
Supplement: Supplementary file 1 [file supplementary]

## Sheet: Description
Supplementary data 2 for Mustafin et al. paper
Tabs
all genes	List of A.thaliana TAIR genes associated with various abiotic stresses
unique genes	List of A.thaliana TAIR genes unique for specific type of stress only
Not included in KEGG	List of A.thaliana TAIR stress-associated genes not included in KEGG annotation

## Sheet: all genes
heat	cold	water-related	light	osmotic	oxidative	salt
AT1G03190	AT1G01060	AT1G03600	AT1G02340	AT1G01510	AT1G01230	AT1G01510
AT1G05850	AT1G01860	AT1G18390	AT1G04400	AT1G02730	AT1G02930	AT1G02730
AT1G08550	AT1G05140	AT1G21270	AT1G05630	AT1G10940	AT1G03680	AT1G03060
AT1G09080	AT1G06960	AT1G22810	AT1G07350	AT1G15100	AT1G07380	AT1G04120
AT1G09090	AT1G10760	AT2G20890	AT1G08540	AT1G16540	AT1G08830	AT1G05850
AT1G12610	AT1G11760	AT2G41225	AT1G09530	AT1G20440	AT1G09000	AT1G06040
AT1G16540	AT1G16540	AT2G41230	AT1G09570	AT1G21529	AT1G09210	AT1G10170
AT1G17780	AT1G16670	AT2G43350	AT1G10120	AT1G27320	AT1G09970	AT1G10370
AT1G21760	AT1G17610	AT3G28270	AT1G10170	AT1G29060	AT1G11210	AT1G10570
AT1G28520	AT1G19120	AT3G53600	AT1G10470	AT1G32230	AT1G13340	AT1G10880
AT1G50500	AT1G20440	AT3G56580	AT1G10522	AT1G32560	AT1G13440	AT1G10940
AT1G52340	AT1G20450	AT4G05590	AT1G11755	AT1G35720	AT1G14870	AT1G12610
AT1G54280	AT1G20823	AT1G36060	AT1G17060	AT1G35910	AT1G16420	AT1G13930
AT1G54490	AT1G21760	AT1G01620	AT1G20090	AT1G42550	AT1G19020	AT1G14080
AT1G56260	AT1G22770	AT1G02205	AT1G21970	AT1G43700	AT1G21520	AT1G14350
AT1G64280	AT1G27320	AT1G02730	AT1G22770	AT1G50500	AT1G27330	AT1G14920
AT1G64520	AT1G28520	AT1G04400	AT1G25540	AT1G53300	AT1G27730	AT1G15100
AT1G66340	AT1G29390	AT1G05180	AT1G26260	AT1G55180	AT1G30460	AT1G15690
AT1G71790	AT1G29395	AT1G05850	AT1G26830	AT1G55870	AT1G31170	AT1G16060
AT1G73130	AT1G33410	AT1G06770	AT1G26945	AT1G58200	AT1G32220	AT1G16540
AT1G74310	AT1G36160	AT1G07000	AT1G31812	AT1G60940	AT1G32230	AT1G16850
AT1G79350	AT1G45231	AT1G07240	AT1G37130	AT1G64670	AT1G32640	AT1G17840
AT1G79440	AT1G46768	AT1G08720	AT1G42550	AT1G65690	AT1G35720	AT1G17950
AT2G03440	AT1G54380	AT1G10370	AT1G48270	AT1G69310	AT1G35910	AT1G21610
AT2G16575	AT1G56070	AT1G11755	AT1G53090	AT1G72180	AT1G49300	AT1G24460
AT2G17690	AT1G56600	AT1G12110	AT1G54160	AT1G77120	AT1G49670	AT1G27730
AT2G20880	AT1G60170	AT1G12610	AT1G55480	AT1G78290	AT1G50170	AT1G27760
AT2G21320	AT1G60650	AT1G13740	AT1G59940	AT2G01150	AT1G50290	AT1G28380
AT2G26150	AT1G70200	AT1G14350	AT1G66840	AT2G17820	AT1G52200	AT1G29060
AT2G26330	AT1G74710	AT1G15360	AT1G68050	AT2G18250	AT1G52500	AT1G30580
AT2G30250	AT1G74960	AT1G15690	AT1G70800	AT2G21660	AT1G52760	AT1G31470
AT2G38470	AT1G77490	AT1G16060	AT1G70940	AT2G22660	AT1G56340	AT1G32230
AT2G39770	AT2G01918	AT1G17950	AT1G75100	AT2G23030	AT1G63460	AT1G35910
AT2G41140	AT2G16500	AT1G19120	AT1G77760	AT2G31870	AT1G64360	AT1G43160
AT2G41160	AT2G17870	AT1G20440	AT1G78370	AT2G32700	AT1G66330	AT1G49300
AT2G42540	AT2G18790	AT1G20450	AT1G79440	AT2G35300	AT1G69190	AT1G50960
AT2G46020	AT2G19450	AT1G27730	AT1G79600	AT2G35510	AT1G72060	AT1G51460
AT3G02885	AT2G20990	AT1G28520	AT2G05070	AT2G37180	AT1G73120	AT1G51500
AT3G06010	AT2G21660	AT1G30100	AT2G05100	AT2G38750	AT1G75280	AT1G53210
AT3G06400	AT2G22300	AT1G30270	AT2G05620	AT2G40190	AT1G76080	AT1G53300
AT3G08970	AT2G33800	AT1G32230	AT2G17260	AT2G40220	AT1G78410	AT1G55870
AT3G09350	AT2G36530	AT1G32560	AT2G18790	AT2G40880	AT1G80130	AT1G56570
AT3G10140	AT2G37230	AT1G33240	AT2G20180	AT2G41560	AT2G01140	AT1G56600
AT3G10800	AT2G38170	AT1G33560	AT2G21150	AT2G42540	AT2G01980	AT1G59860
AT3G16770	AT2G39810	AT1G45249	AT2G21320	AT2G42580	AT2G04795	AT1G60220
AT3G17880	AT2G40880	AT1G46768	AT2G21650	AT2G43790	AT2G05710	AT1G60490
AT3G24320	AT2G40970	AT1G47128	AT2G23440	AT2G43850	AT2G14170	AT1G60940
AT3G25230	AT2G42530	AT1G52340	AT2G24790	AT2G47900	AT2G15560	AT1G61210
AT3G28030	AT2G42540	AT1G52690	AT2G26300	AT3G08730	AT2G19310	AT1G64460
AT3G47220	AT2G43790	AT1G52890	AT2G26710	AT3G12490	AT2G19810	AT1G65690
AT3G47860	AT2G46090	AT1G54160	AT2G30170	AT3G12630	AT2G21195	AT1G66230
AT3G53110	AT2G46210	AT1G58440	AT2G36530	AT3G14440	AT2G21640	AT1G66350
AT3G53990	AT2G46590	AT1G60200	AT2G36890	AT3G17510	AT2G22080	AT1G67580
AT3G56740	AT2G46810	AT1G67360	AT2G36910	AT3G20250	AT2G24150	AT1G69310
AT4G04950	AT2G46830	AT1G69310	AT2G36990	AT3G23830	AT2G28190	AT1G73500
AT4G11260	AT2G47180	AT1G69600	AT2G37678	AT3G24860	AT2G31870	AT1G73660
AT4G12400	AT3G02790	AT1G70670	AT2G38050	AT3G25230	AT2G35510	AT1G74920
AT4G13550	AT3G02870	AT1G74920	AT2G39840	AT3G33520	AT2G39800	AT1G78310
AT4G13670	AT3G04740	AT1G76080	AT2G40080	AT3G45640	AT2G40000	AT2G01430
AT4G15802	AT3G05880	AT1G78080	AT2G42080	AT3G46930	AT2G40880	AT2G01570
AT4G19020	AT3G05890	AT1G79600	AT2G42620	AT3G50500	AT2G41090	AT2G01900
AT4G21320	AT3G06510	AT1G80410	AT2G43010	AT3G54560	AT2G44240	AT2G01980
AT4G23100	AT3G07740	AT1G80710	AT2G46260	AT3G56580	AT2G47510	AT2G03680
AT4G26080	AT3G08920	AT2G04030	AT2G46340	AT3G58620	AT3G01420	AT2G04030
AT4G26780	AT3G11170	AT2G05620	AT2G46370	AT3G59770	AT3G04120	AT2G15390
AT4G26840	AT3G12490	AT2G17820	AT2G46590	AT3G63060	AT3G06050	AT2G16005
AT4G26850	AT3G14080	AT2G18960	AT2G47700	AT4G01370	AT3G06110	AT2G16500
AT4G27670	AT3G20930	AT2G25180	AT3G02730	AT4G01420	AT3G06590	AT2G17270
AT4G29040	AT3G21300	AT2G26650	AT3G02790	AT4G04340	AT3G06930	AT2G18250
AT4G29770	AT3G22370	AT2G28625	AT3G04110	AT4G04920	AT3G07700	AT2G19450
AT4G38630	AT3G22690	AT2G29130	AT3G05420	AT4G08500	AT3G08670	AT2G26190
AT5G02500	AT3G23250	AT2G30580	AT3G08550	AT4G11230	AT3G09640	AT2G26430
AT5G03280	AT3G26420	AT2G31470	AT3G19820	AT4G13850	AT3G10020	AT2G26650
AT5G05410	AT3G49530	AT2G31870	AT3G21150	AT4G14605	AT3G10930	AT2G27300
AT5G05630	AT3G50970	AT2G33230	AT3G22690	AT4G16830	AT3G11050	AT2G30250
AT5G07100	AT3G52150	AT2G34208	AT3G27690	AT4G17615	AT3G11220	AT2G32010
AT5G07350	AT3G53110	AT2G35300	AT3G28860	AT4G18780	AT3G12490	AT2G32700
AT5G10010	AT3G53460	AT2G35930	AT3G44450	AT4G25520	AT3G14430	AT2G33080
AT5G16820	AT3G55160	AT2G36830	AT3G45780	AT4G33950	AT3G14990	AT2G33700
AT5G17020	AT3G55580	AT2G37040	AT3G47340	AT4G34710	AT3G15360	AT2G34208
AT5G18040	AT3G55990	AT2G37170	AT3G47390	AT4G37900	AT3G16670	AT2G34620
AT5G21160	AT3G61580	AT2G37180	AT3G47860	AT4G38240	AT3G16890	AT2G35510
AT5G27660	AT3G61950	AT2G38880	AT3G48100	AT4G39090	AT3G20340	AT2G37678
AT5G42020	AT4G01370	AT2G39550	AT3G54610	AT4G40010	AT3G22200	AT2G38170
AT5G42980	AT4G03430	AT2G39800	AT3G59220	AT5G01270	AT3G22380	AT2G38340
AT5G43940	AT4G04800	AT2G40220	AT3G61600	AT5G01410	AT3G23910	AT2G38470
AT5G44650	AT4G04920	AT2G40880	AT3G61850	AT5G03280	AT3G25530	AT2G39770
AT5G47550	AT4G08500	AT2G42540	AT3G62030	AT5G06760	AT3G45640	AT2G40830
AT5G47910	AT4G10030	AT2G42620	AT4G01120	AT5G08560	AT3G46090	AT2G41010
AT5G48570	AT4G12470	AT2G45960	AT4G04770	AT5G08590	AT3G46930	AT2G41560
AT5G53060	AT4G12480	AT2G47780	AT4G08920	AT5G12030	AT3G47450	AT2G43430
AT5G53170	AT4G13850	AT2G47800	AT4G13670	AT5G13170	AT3G47860	AT2G43790
AT5G53400	AT4G16150	AT3G01650	AT4G14110	AT5G15960	AT3G51610	AT2G45640
AT5G56010	AT4G16420	AT3G04090	AT4G15090	AT5G17850	AT3G53030	AT2G45960
AT5G57050	AT4G19330	AT3G05500	AT4G16250	AT5G19660	AT3G53990	AT2G46500
AT5G58070	AT4G24500	AT3G05700	AT4G17490	AT5G19690	AT3G55460	AT2G47180
AT5G59820	AT4G24770	AT3G06010	AT4G18290	AT5G24660	AT3G60980	AT2G47460
AT5G60410	AT4G25470	AT3G10500	AT4G22260	AT5G35550	AT3G62030	AT2G47580
AT5G61780	AT4G25480	AT3G11020	AT4G25560	AT5G35750	AT4G00290	AT2G47900
AT5G62390	AT4G25490	AT3G12490	AT4G27430	AT5G45800	AT4G02380	AT3G03450
AT5G63870	AT4G26080	AT3G12630	AT4G27670	AT5G49450	AT4G02580	AT3G05360
AT5G67030	AT4G28210	AT3G13672	AT4G28556	AT5G52310	AT4G03240	AT3G05700
	AT4G29810	AT3G14080	AT4G28610	AT5G53060	AT4G03520	AT3G06010
	AT4G31690	AT3G14440	AT4G28860	AT5G57050	AT4G04800	AT3G06370
	AT4G33980	AT3G15500	AT4G28880	AT5G57345	AT4G08940	AT3G06590
	AT4G34710	AT3G16240	AT4G31390	AT5G57630	AT4G10090	AT3G06930
	AT4G35790	AT3G16640	AT4G31500	AT5G58580	AT4G11010	AT3G09350
	AT4G36020	AT3G16800	AT4G34530	AT5G62090	AT4G11830	AT3G10930
	AT4G36930	AT3G16857	AT4G36930	AT5G62460	AT4G11850	AT3G12360
	AT4G38680	AT3G18490	AT4G37270	AT5G63650	AT4G12000	AT3G16890
	AT4G39730	AT3G19600	AT4G38740	AT5G66880	AT4G17070	AT3G17510
	AT5G04280	AT3G20250	AT4G40060	AT5G67030	AT4G17410	AT3G17980
	AT5G06760	AT3G20310	AT4G40100	AT5G67590	AT4G25100	AT3G18870
	AT5G09410	AT3G22310	AT5G02200	AAR1	AT4G25130	AT3G19490
	AT5G10450	AT3G22380	AT5G07690	PST1	AT4G26970	AT3G20250
	AT5G15090	AT3G23050	AT5G08560		AT4G35000	AT3G22200
	AT5G15960	AT3G23250	AT5G16400		AT4G35090	AT3G22310
	AT5G17890	AT3G24715	AT5G17880		AT4G39640	AT3G23250
	AT5G20230	AT3G26090	AT5G20730		AT5G01410	AT3G23830
	AT5G23070	AT3G28455	AT5G24120		AT5G03280	AT3G23940
	AT5G35750	AT3G29320	AT5G27620		AT5G07460	AT3G27460
	AT5G38480	AT3G30775	AT5G27630		AT5G08670	AT3G44110
	AT5G42900	AT3G45140	AT5G28490		AT5G09830	AT3G45680
	AT5G50950	AT3G46620	AT5G38150		AT5G13680	AT3G46550
	AT5G52370	AT3G46930	AT5G39760		AT5G16970	AT3G46930
	AT5G52440	AT3G46970	AT5G43470		AT5G16990	AT3G47450
	AT5G53470	AT3G47600	AT5G43630		AT5G18040	AT3G47950
	AT5G54590	AT3G50310	AT5G48560		AT5G18100	AT3G48330
	AT5G59010	AT3G50500	AT5G49230		AT5G19875	AT3G48680
	AT5G59820	AT3G51920	AT5G55280		AT5G20140	AT3G48850
	AT5G62390	AT3G52150	AT5G57360		AT5G20230	AT3G49810
	AT5G62470	AT3G52450	AT5G58070		AT5G25620	AT3G50310
	AT5G63770	AT3G53420	AT5G58140		AT5G27830	AT3G50500
	AT5G63980	AT3G54770	AT5G58960		AT5G28030	AT3G51390
	AT5G64220	AT3G54820	AT5G59820		AT5G37510	AT3G51780
	AT5G65430	AT3G59380	AT5G61230		AT5G39610	AT3G51920
	AT5G65940	AT3G61050	AT5G61270		AT5G41150	AT3G51960
	AT5G66400	AT3G61430	AT5G63870		AT5G42000	AT3G52150
	AT5G67320	AT3G62770	AT5G63980		AT5G43750	AT3G54770
	AT5G67590	AT3G63060	AT5G64330		AT5G47650	AT3G55270
	CHS2	AT4G00430	AT5G64940		AT5G50350	AT3G57180
	CHS4	AT4G01420	BLU2		AT5G55070	AT3G57480
	CHS5	AT4G01470	BLU3		AT5G56550	AT3G61050
	CHS6	AT4G03260	CP3		AT5G57345	AT3G61890
	SFR1	AT4G08920	DOC2		AT5G58070	AT3G62030
	SFR7	AT4G17615	FIN2		AT5G59080	AT3G63060
		AT4G18780	HYP1		AT5G59820	AT4G01370
		AT4G20140	HYP2		AT5G59880	AT4G01420
		AT4G23450	LSD5		AT5G60640	AT4G06634
		AT4G24020	LSR1		AT5G63980	AT4G10310
		AT4G24190	NPH2		AT5G64940	AT4G12480
		AT4G24275	PST1		ATMG01190	AT4G13850
		AT4G25480	SRL1		GPX	AT4G14300
		AT4G26070	SUN7			AT4G14605
		AT4G27410				AT4G16830
		AT4G31390				AT4G17615
		AT4G31920				AT4G20310
		AT4G33950				AT4G21670
		AT4G34100				AT4G22330
		AT4G34890				AT4G23650
		AT4G35100				AT4G24190
		AT4G39090				AT4G24500
		AT4G39730				AT4G24560
		AT5G03740				AT4G24800
		AT5G05410				AT4G25520
		AT5G06530				AT4G26630
		AT5G06760				AT4G27710
		AT5G07690				AT4G29810
		AT5G08120				AT4G32150
		AT5G08490				AT4G33730
		AT5G08620				AT4G33950
		AT5G09410				AT4G34710
		AT5G11270				AT4G37260
		AT5G13030				AT4G38630
		AT5G13750				AT4G39730
		AT5G13780				AT4G40010
		AT5G14420				AT5G01410
		AT5G18290				AT5G01520
		AT5G25370				AT5G02020
		AT5G25620				AT5G02410
		AT5G27620				AT5G03280
		AT5G27930				AT5G03740
		AT5G40280				AT5G04500
		AT5G44650				AT5G04760
		AT5G45340				AT5G05300
		AT5G47100				AT5G05660
		AT5G48870				AT5G06210
		AT5G56030				AT5G07350
		AT5G57050				AT5G08450
		AT5G58430				AT5G08520
		AT5G58787				AT5G08590
		AT5G59550				AT5G08620
		AT5G60410				AT5G11150
		AT5G62470				AT5G13330
		AT5G63980				AT5G14040
		AT5G64010				AT5G14920
		AT5G64960				AT5G19690
		AT5G66880				AT5G22360
		AT5G67030				AT5G24120
		HAS1				AT5G24240
		HAS3				AT5G25370
		LWR1				AT5G26742
		LWR2				AT5G26751
		AT1G12480				AT5G27150
		AT4G14300				AT5G27200
		AT4G34220				AT5G35080
		AT5G05860				AT5G35410
		AT5G18320				AT5G37370
		AT5G52050				AT5G40550
		AT5G52440				AT5G40770
						AT5G44440
						AT5G46180
						AT5G46350
						AT5G49450
						AT5G51110
						AT5G55580
						AT5G56030
						AT5G57630
						AT5G58070
						AT5G58580
						AT5G59010
						AT5G60920
						AT5G61780
						AT5G62090
						AT5G62460
						AT5G63110
						AT5G63510
						AT5G63650
						AT5G63980
						AT5G66880
						AT5G67300
						PST1

## Sheet: unique genes
heat	cold	water-related	light	osmotic	oxidative	salt
AT1G03190	AT1G01060	AT1G01620	AT1G02340	AT1G21529	AT1G01230	AT1G03060
AT1G08550	AT1G01860	AT1G02205	AT1G05630	AT1G43700	AT1G02930	AT1G04120
AT1G09080	AT1G05140	AT1G05180	AT1G07350	AT1G55180	AT1G03680	AT1G06040
AT1G09090	AT1G06960	AT1G06770	AT1G08540	AT1G58200	AT1G07380	AT1G10570
AT1G17780	AT1G10760	AT1G07000	AT1G09530	AT1G64670	AT1G08830	AT1G10880
AT1G54280	AT1G11760	AT1G07240	AT1G09570	AT1G72180	AT1G09000	AT1G13930
AT1G54490	AT1G16670	AT1G08720	AT1G10120	AT1G77120	AT1G09210	AT1G14080
AT1G56260	AT1G17610	AT1G12110	AT1G10470	AT1G78290	AT1G09970	AT1G14920
AT1G64280	AT1G20823	AT1G12480	AT1G10522	AT2G01150	AT1G11210	AT1G16850
AT1G64520	AT1G29390	AT1G13740	AT1G17060	AT2G22660	AT1G13340	AT1G17840
AT1G66340	AT1G29395	AT1G15360	AT1G20090	AT2G23030	AT1G13440	AT1G21610
AT1G71790	AT1G33410	AT1G18390	AT1G21970	AT2G38750	AT1G14870	AT1G24460
AT1G73130	AT1G36160	AT1G21270	AT1G25540	AT2G40190	AT1G16420	AT1G27760
AT1G74310	AT1G45231	AT1G22810	AT1G26260	AT2G42580	AT1G19020	AT1G28380
AT1G79350	AT1G54380	AT1G30100	AT1G26830	AT2G43850	AT1G21520	AT1G30580
AT2G03440	AT1G56070	AT1G30270	AT1G26945	AT3G08730	AT1G27330	AT1G31470
AT2G16575	AT1G60170	AT1G33240	AT1G31812	AT3G24860	AT1G30460	AT1G43160
AT2G17690	AT1G60650	AT1G33560	AT1G37130	AT3G33520	AT1G31170	AT1G50960
AT2G20880	AT1G70200	AT1G45249	AT1G48270	AT3G54560	AT1G32220	AT1G51460
AT2G26150	AT1G74710	AT1G47128	AT1G53090	AT3G58620	AT1G32640	AT1G51500
AT2G26330	AT1G74960	AT1G52690	AT1G55480	AT3G59770	AT1G49670	AT1G53210
AT2G30250	AT1G77490	AT1G52890	AT1G59940	AT4G04340	AT1G50170	AT1G56570
AT2G38470	AT2G01918	AT1G58440	AT1G66840	AT4G11230	AT1G50290	AT1G59860
AT2G39770	AT2G17870	AT1G60200	AT1G68050	AT4G37900	AT1G52200	AT1G60220
AT2G41140	AT2G20990	AT1G67360	AT1G70800	AT4G38240	AT1G52500	AT1G60490
AT2G41160	AT2G22300	AT1G69600	AT1G70940	AT5G01270	AT1G52760	AT1G61210
AT2G46020	AT2G33800	AT1G70670	AT1G75100	AT5G12030	AT1G56340	AT1G64460
AT3G02885	AT2G37230	AT1G78080	AT1G77760	AT5G13170	AT1G63460	AT1G66230
AT3G06400	AT2G39810	AT1G80410	AT1G78370	AT5G17850	AT1G64360	AT1G66350
AT3G08970	AT2G40970	AT1G80710	AT2G05070	AT5G19660	AT1G66330	AT1G67580
AT3G09350	AT2G42530	AT2G18960	AT2G05100	AT5G24660	AT1G69190	AT1G73500
AT3G10140	AT2G46090	AT2G20890	AT2G17260	AT5G35550	AT1G72060	AT1G73660
AT3G10800	AT2G46210	AT2G25180	AT2G20180	AT5G45800	AT1G73120	AT1G78310
AT3G16770	AT2G46810	AT2G28625	AT2G21150	AT5G52310	AT1G75280	AT2G01430
AT3G17880	AT2G46830	AT2G29130	AT2G21650	AAR1	AT1G78410	AT2G01570
AT3G24320	AT3G02870	AT2G30580	AT2G23440		AT1G80130	AT2G01900
AT3G28030	AT3G04740	AT2G31470	AT2G24790		AT2G01140	AT2G03680
AT3G47220	AT3G05880	AT2G33230	AT2G26300		AT2G04795	AT2G15390
AT3G56740	AT3G05890	AT2G35930	AT2G26710		AT2G05710	AT2G16005
AT4G04950	AT3G06510	AT2G36830	AT2G30170		AT2G14170	AT2G17270
AT4G11260	AT3G07740	AT2G37040	AT2G36890		AT2G15560	AT2G26190
AT4G12400	AT3G08920	AT2G37170	AT2G36910		AT2G19310	AT2G26430
AT4G13550	AT3G11170	AT2G38880	AT2G36990		AT2G19810	AT2G27300
AT4G15802	AT3G20930	AT2G39550	AT2G38050		AT2G21195	AT2G32010
AT4G19020	AT3G21300	AT2G41225	AT2G39840		AT2G21640	AT2G33080
AT4G21320	AT3G22370	AT2G41230	AT2G40080		AT2G22080	AT2G33700
AT4G23100	AT3G26420	AT2G43350	AT2G42080		AT2G24150	AT2G34620
AT4G26780	AT3G49530	AT2G47780	AT2G43010		AT2G28190	AT2G38340
AT4G26840	AT3G50970	AT2G47800	AT2G46260		AT2G40000	AT2G40830
AT4G26850	AT3G53460	AT3G01650	AT2G46340		AT2G41090	AT2G41010
AT4G29040	AT3G55160	AT3G04090	AT2G46370		AT2G44240	AT2G43430
AT4G29770	AT3G55580	AT3G05500	AT2G47700		AT2G47510	AT2G45640
AT4G38630	AT3G55990	AT3G10500	AT3G02730		AT3G01420	AT2G46500
AT5G02500	AT3G61580	AT3G11020	AT3G04110		AT3G04120	AT2G47460
AT5G05630	AT3G61950	AT3G13672	AT3G05420		AT3G06050	AT2G47580
AT5G07100	AT4G03430	AT3G15500	AT3G08550		AT3G06110	AT3G03450
AT5G07350	AT4G10030	AT3G16240	AT3G19820		AT3G07700	AT3G05360
AT5G10010	AT4G12470	AT3G16640	AT3G21150		AT3G08670	AT3G06370
AT5G16820	AT4G16150	AT3G16800	AT3G27690		AT3G09640	AT3G12360
AT5G17020	AT4G16420	AT3G16857	AT3G28860		AT3G10020	AT3G17980
AT5G21160	AT4G19330	AT3G18490	AT3G44450		AT3G11050	AT3G18870
AT5G27660	AT4G24770	AT3G19600	AT3G45780		AT3G11220	AT3G19490
AT5G42020	AT4G25470	AT3G20310	AT3G47340		AT3G14430	AT3G23940
AT5G42980	AT4G25490	AT3G23050	AT3G47390		AT3G14990	AT3G27460
AT5G43940	AT4G28210	AT3G24715	AT3G48100		AT3G15360	AT3G44110
AT5G47550	AT4G31690	AT3G26090	AT3G54610		AT3G16670	AT3G45680
AT5G47910	AT4G33980	AT3G28270	AT3G59220		AT3G20340	AT3G46550
AT5G48570	AT4G35790	AT3G28455	AT3G61600		AT3G23910	AT3G47950
AT5G53170	AT4G36020	AT3G29320	AT3G61850		AT3G25530	AT3G48330
AT5G53400	AT4G38680	AT3G30775	AT4G01120		AT3G46090	AT3G48680
AT5G56010	AT5G04280	AT3G45140	AT4G04770		AT3G51610	AT3G48850
AT5G61780	AT5G10450	AT3G46620	AT4G14110		AT3G53030	AT3G49810
	AT5G15090	AT3G46970	AT4G15090		AT3G55460	AT3G51390
	AT5G17890	AT3G47600	AT4G16250		AT3G60980	AT3G51780
	AT5G23070	AT3G52450	AT4G17490		AT4G00290	AT3G51960
	AT5G38480	AT3G53420	AT4G18290		AT4G02380	AT3G55270
	AT5G42900	AT3G53600	AT4G22260		AT4G02580	AT3G57180
	AT5G50950	AT3G54820	AT4G25560		AT4G03240	AT3G57480
	AT5G52370	AT3G59380	AT4G27430		AT4G03520	AT3G61890
	AT5G53470	AT3G61430	AT4G28556		AT4G08940	AT4G06634
	AT5G54590	AT3G62770	AT4G28610		AT4G10090	AT4G10310
	AT5G63770	AT4G00430	AT4G28860		AT4G11010	AT4G20310
	AT5G64220	AT4G01470	AT4G28880		AT4G11830	AT4G21670
	AT5G65430	AT4G03260	AT4G31500		AT4G11850	AT4G22330
	AT5G65940	AT4G05590	AT4G34530		AT4G12000	AT4G23650
	AT5G66400	AT4G20140	AT4G37270		AT4G17070	AT4G24560
	AT5G67320	AT4G23450	AT4G38740		AT4G17410	AT4G24800
	CHS2	AT4G24020	AT4G40060		AT4G25100	AT4G26630
	CHS4	AT4G24275	AT4G40100		AT4G25130	AT4G27710
	CHS5	AT4G26070	AT5G02200		AT4G26970	AT4G32150
	CHS6	AT4G27410	AT5G16400		AT4G35000	AT4G33730
	SFR1	AT4G31920	AT5G17880		AT4G35090	AT4G37260
	SFR7	AT4G34100	AT5G20730		AT4G39640	AT5G01520
		AT4G34220	AT5G27630		AT5G07460	AT5G02020
		AT4G34890	AT5G28490		AT5G08670	AT5G02410
		AT4G35100	AT5G38150		AT5G09830	AT5G04500
		AT5G05860	AT5G39760		AT5G13680	AT5G04760
		AT5G06530	AT5G43470		AT5G16970	AT5G05300
		AT5G08120	AT5G43630		AT5G16990	AT5G05660
		AT5G08490	AT5G48560		AT5G18100	AT5G06210
		AT5G11270	AT5G49230		AT5G19875	AT5G08450
		AT5G13030	AT5G55280		AT5G20140	AT5G08520
		AT5G13750	AT5G57360		AT5G27830	AT5G11150
		AT5G13780	AT5G58140		AT5G28030	AT5G13330
		AT5G14420	AT5G58960		AT5G37510	AT5G14040
		AT5G18290	AT5G61230		AT5G39610	AT5G14920
		AT5G18320	AT5G61270		AT5G41150	AT5G22360
		AT5G27930	AT5G64330		AT5G42000	AT5G24240
		AT5G40280	BLU2		AT5G43750	AT5G26742
		AT5G45340	BLU3		AT5G47650	AT5G26751
		AT5G47100	CP3		AT5G50350	AT5G27150
		AT5G48870	DOC2		AT5G55070	AT5G27200
		AT5G52050	FIN2		AT5G56550	AT5G35080
		AT5G58430	HYP1		AT5G59080	AT5G35410
		AT5G58787	HYP2		AT5G59880	AT5G37370
		AT5G59550	LSD5		AT5G60640	AT5G40550
		AT5G64010	LSR1		ATMG01190	AT5G40770
		AT5G64960	NPH2		GPX	AT5G44440
		HAS1	SRL1			AT5G46180
		HAS3	SUN7			AT5G46350
		LWR1				AT5G51110
		AT1G03600				AT5G55580
		AT1G36060				AT5G60920
		LWR2				AT5G63110
						AT5G63510
						AT5G67300

## Sheet: Not included in KEGG
heat	cold	water-related	light	osmotic	oxidative	salt
	CHS2	HAS1	BLU2	AAR1	ATMG01190	PST1
	CHS4	HAS3	BLU3	PST1	GPX
	CHS5	LWR1	CP3
	CHS6	LWR2	DOC2
	SFR1		FIN2
	SFR7		HYP1
			HYP2
			LSD5
			LSR1
			NPH2
			PST1
			SRL1
			SUN7
