# Supplementary material for: Phylostratigraphic Analysis Shows the Earliest Origination of the Stress Associated Genes in <em>A. thaliana</em>
Source: Preprints.org preprint supplement (doi:10.20944/preprints201811.0352.v1), 2018-11-15
Supplement: Supplementary file 2 [file Supplementary_file_1.xlsx]

## Sheet: Description
Supplementary data 1 for Mustafin et al. paper
GO list tab	List of GO terms characterizing seven types of plant stress response

## Sheet: GO list
Stress type	GO term ID	GO term name
heat	GO:0061408	positive regulation of transcription from RNA polymerase II promoter in response to heat stress
heat	GO:0003773	obsolete heat shock protein activity
heat	GO:0009408	response to heat
heat	GO:0010286	heat acclimation
heat	GO:0031072	heat shock protein binding
heat	GO:0031990	mRNA export from nucleus in response to heat stress
heat	GO:0034605	cellular response to heat
heat	GO:0070370	cellular heat acclimation
heat	GO:0070414	trehalose metabolism in response to heat stress
heat	GO:0090441	trehalose biosynthesis in response to heat stress
heat	GO:0090442	trehalose catabolism in response to heat stress
heat	GO:1900034	regulation of cellular response to heat
heat	GO:1900035	negative regulation of cellular response to heat
heat	GO:1900036	positive regulation of cellular response to heat
cold	GO:0009409	response to cold
cold	GO:0009631	cold acclimation
cold	GO:0061411	positive regulation of transcription from RNA polymerase II promoter in response to cold
cold	GO:0070417	cellular response to cold
water -related	GO:0003091	renal water homeostasis
water -related	GO:0003092	renal water retention
water -related	GO:0003097	renal water transport
water -related	GO:0005372	water transmembrane transporter activity
water -related	GO:0006833	water transport
water -related	GO:0009414	response to water deprivation
water -related	GO:0009992	cellular water homeostasis
water -related	GO:0035377	transepithelial water transport
water -related	GO:0042631	cellular response to water deprivation
water -related	GO:0050891	multicellular organismal water homeostasis
water -related	GO:0070295	renal water absorption
water -related	GO:0070416	trehalose metabolism in response to water deprivation
water -related	GO:0071462	cellular response to water stimulus
water -related	GO:0072514	trehalose transport in response to water deprivation
water -related	GO:0080148	negative regulation of response to water deprivation
water -related	GO:1902427	regulation of water channel activity
water -related	GO:1902428	negative regulation of water channel activity
water -related	GO:1902429	positive regulation of water channel activity
water -related	GO:1902433	positive regulation of water channel activity involved in maintenance of lens transparency
water -related	GO:1902584	positive regulation of response to water deprivation
water -related	GO:1990785	response to water-immersion restraint stress
water -related	GO:2000070	regulation of response to water deprivation
water -related	GO:2001151	regulation of renal water transport
water -related	GO:2001152	negative regulation of renal water transport
water -related	GO:2001153	positive regulation of renal water transport
water -related	GO:0009633	obsolete drought tolerance
water -related	GO:0042631	cellular response to water deprivation
water -related	GO:0009819	drought recovery
light	GO:0008085	obsolete phototransduction, visible light, light adaptation
light	GO:0009416	response to light stimulus
light	GO:0009583	detection of light stimulus
light	GO:0009584	detection of visible light
light	GO:0009637	response to blue light
light	GO:0009639	response to red or far red light
light	GO:0009642	response to light intensity
light	GO:0009644	response to high light intensity
light	GO:0009645	response to low light intensity stimulus
light	GO:0009785	blue light signaling pathway
light	GO:0009882	blue light photoreceptor activity
light	GO:0010114	response to red light
light	GO:0010161	red light signaling pathway
light	GO:0071482	cellular response to light stimulus
light	GO:0071483	cellular response to blue light
light	GO:0071484	cellular response to light intensity
light	GO:0071485	cellular response to absence of light
light	GO:0071486	cellular response to high light intensity
light	GO:0071487	cellular response to low light intensity stimulus
light	GO:0071488	cellular response to very low light intensity stimulus
light	GO:0071489	cellular response to red or far red light
light	GO:0071490	cellular response to far red light
light	GO:0071491	cellular response to red light
light	GO:0009637	response to blue light
light	GO:0009639	response to red or far red light
light	GO:0009642	response to light intensity
light	GO:0009644	response to high light intensity
light	GO:0009645	response to low light intensity stimulus
light	GO:0009646	response to absence of light
light	GO:0009785	blue light signaling pathway
light	GO:0009882	blue light photoreceptor activity
light	GO:0009883	red or far-red light photoreceptor activity
light	GO:0009906	response to photoperiod, blue light
light	GO:0009907	response to photoperiod, red light
light	GO:0010114	response to red light
light	GO:0010161	red light signaling pathway
light	GO:0016037	light absorption
light	GO:0071482	cellular response to light stimulus
light	GO:0071483	cellular response to blue light
light	GO:0071484	cellular response to light intensity
light	GO:0071485	cellular response to absence of light
light	GO:0071486	cellular response to high light intensity
light	GO:0071487	cellular response to low light intensity stimulus
light	GO:0071488	cellular response to very low light intensity stimulus
light	GO:0071489	cellular response to red or far red light
light	GO:0071490	cellular response to far red light
light	GO:0071491	cellular response to red light
light	GO:2000030	regulation of response to red or far red light
light	GO:0009642	response to light intensity
light	GO:0009644	response to high light intensity
light	GO:0071486	cellular response to high light intensity
osmotic	GO:0006970	response to osmotic stress
osmotic	GO:0006972	hyperosmotic response
osmotic	GO:0010335	response to non-ionic osmotic stress
osmotic	GO:0032061	negative regulation of translation in response to osmotic stress
osmotic	GO:0032062	positive regulation of translation in response to osmotic stress
osmotic	GO:0032063	negative regulation of translational initiation in response to osmotic stress
osmotic	GO:0032064	positive regulation of translational initiation in response to osmotic stress
osmotic	GO:0043557	regulation of translation in response to osmotic stress
osmotic	GO:0043561	regulation of translational initiation in response to osmotic stress
osmotic	GO:0043575	detection of osmotic stimulus
osmotic	GO:0047484	regulation of response to osmotic stress
osmotic	GO:0061393	positive regulation of transcription from RNA polymerase II promoter in response to osmotic stress
osmotic	GO:0071470	cellular response to osmotic stress
osmotic	GO:0071471	cellular response to non-ionic osmotic stress
osmotic	GO:0071474	cellular hyperosmotic response
osmotic	GO:0071475	cellular hyperosmotic salinity response
osmotic	GO:0100044	negative regulation of cellular hyperosmotic salinity response by transcription from RNA polymerase II promoter
osmotic	GO:0106049	regulation of cellular response to osmotic stress
osmotic	GO:1900069	regulation of cellular hyperosmotic salinity response
osmotic	GO:1900070	negative regulation of cellular hyperosmotic salinity response
osmotic	GO:1900464	negative regulation of cellular hyperosmotic salinity response by negative regulation of transcription from RNA polymerase II promoter
osmotic	GO:1900532	obsolete negative regulation of cell proliferation involved in cellular hyperosmotic response
osmotic	GO:1902032	obsolete regulation of transcription from RNA polymerase II promoter involved in response to osmotic stress
oxidative	GO:0006979	response to oxidative stress
oxidative	GO:0008631	intrinsic apoptotic signaling pathway in response to oxidative stress
oxidative	GO:0032938	negative regulation of translation in response to oxidative stress
oxidative	GO:0032939	positive regulation of translation in response to oxidative stress
oxidative	GO:0034599	cellular response to oxidative stress
oxidative	GO:0036091	positive regulation of transcription from RNA polymerase II promoter in response to oxidative stress
oxidative	GO:0036283	obsolete positive regulation of transcription factor import into nucleus in response to oxidative stress
oxidative	GO:0036473	cell death in response to oxidative stress
oxidative	GO:0043556	regulation of translation in response to oxidative stress
oxidative	GO:0043619	regulation of transcription from RNA polymerase II promoter in response to oxidative stress
oxidative	GO:0061417	negative regulation of transcription from RNA polymerase II promoter in response to oxidative stress
oxidative	GO:0070994	detection of oxidative stress
oxidative	GO:0090403	oxidative stress-induced premature senescence
oxidative	GO:0100038	regulation of cellular response to oxidative stress by transcription from RNA polymerase II promoter
oxidative	GO:1900407	regulation of cellular response to oxidative stress
oxidative	GO:1900408	negative regulation of cellular response to oxidative stress
oxidative	GO:1900409	positive regulation of cellular response to oxidative stress
oxidative	GO:1900427	regulation of cellular response to oxidative stress by regulation of transcription from RNA polymerase II promoter
oxidative	GO:1902175	regulation of oxidative stress-induced intrinsic apoptotic signaling pathway
oxidative	GO:1902176	negative regulation of oxidative stress-induced intrinsic apoptotic signaling pathway
oxidative	GO:1902177	positive regulation of oxidative stress-induced intrinsic apoptotic signaling pathway
oxidative	GO:1902882	regulation of response to oxidative stress
oxidative	GO:1902883	negative regulation of response to oxidative stress
oxidative	GO:1902884	positive regulation of response to oxidative stress
oxidative	GO:1903201	regulation of oxidative stress-induced cell death
oxidative	GO:1990436	obsolete MAPK cascade involved in oxidative stress signaling pathway
oxidative	GO:1990985	obsolete apoptosis in response to oxidative stress
oxidative	GO:2000815	regulation of mRNA stability involved in response to oxidative stress
salt	GO:0009651	response to salt stress
salt	GO:0036251	positive regulation of transcription from RNA polymerase II promoter in response to salt stress
salt	GO:0061404	positive regulation of transcription from RNA polymerase II promoter in response to increased salt
salt	GO:0061416	regulation of transcription from RNA polymerase II promoter in response to salt stress
salt	GO:0071472	cellular response to salt stress
salt	GO:0101007	negative regulation of transcription from RNA polymerase II promoter in response to salt stress
salt	GO:0101008	negative regulation of transcription from RNA polymerase II promoter in response to increased salt
salt	GO:1900530	obsolete regulation of cell shape involved in cellular response to salt stress
salt	GO:1901000	regulation of response to salt stress
salt	GO:1901001	negative regulation of response to salt stress
salt	GO:1901002	positive regulation of response to salt stress
salt	GO:1901196	positive regulation of calcium-mediated signaling involved in cellular response to salt stress
salt	GO:1901199	positive regulation of calcium ion transport into cytosol involved in cellular response to salt stress
salt	GO:1901200	negative regulation of calcium ion transport into cytosol involved in cellular response to salt stress
salt	GO:1902074	response to salt
salt	GO:1902075	cellular response to salt
salt	GO:1901702	salt transmembrane transporter activity
